# Supplementary material
Source: PubMed Central journal article supplement (PMC9662910)
Supplement: can-21-0730_table_st1_suppst1.pdf [file can-21-0730_table_st1_suppst1.pdf]

| Publication                                                        | PubMed ID | Threshold (months) |           |
|--------------------------------------------------------------------|-----------|--------------------|-----------|
|                                                                    |           | Short-term         | Long-term |
| Álvarez-Torres <i>et al.</i> 2021 <i>NMR Biomed</i>                | 33470039  | < 13               | > 13      |
| Chen <i>et al.</i> 2018 <i>Zhong Nan Da Xue Xue Bao Yi Xue Ban</i> | 29774872  | < 12               | > 36      |
| Donson <i>et al.</i> 2012 <i>J Immunol</i>                         | 22802421  | < 9                | > 24      |
| Geisenberger <i>et al.</i> 2015 <i>Acta Neuropathol</i>            | 25931051  | < 10               | > 36      |
| Hermansen <i>et al.</i> 2017 <i>PLoS One</i>                       | 29136645  | < 13               | > 13      |
| Hwang <i>et al.</i> 2019 <i>Acta Neuropathol Commun</i>            | 31159876  | < 12               | > 36      |
| Kim <i>et al.</i> 2013 <i>Neuro-oncology</i>                       | 23502430  | < 24               | > 24      |
| Patel <i>et al.</i> 2013 <i>PLoS Comput Biol</i>                   | 24068912  | < 7                | > 21      |
| Reifenberger <i>et al.</i> 2014 <i>Int J Cancer</i>                | 24615357  | < 12               | > 36      |
| Zhang <i>et al.</i> 2013 <i>Cancer Lett</i>                        | 22960273  | < 9                | > 18      |
