# Supplementary material
Source: PubMed Central journal article supplement (PMC9662910)

Figure S1

### Edge weight similarity

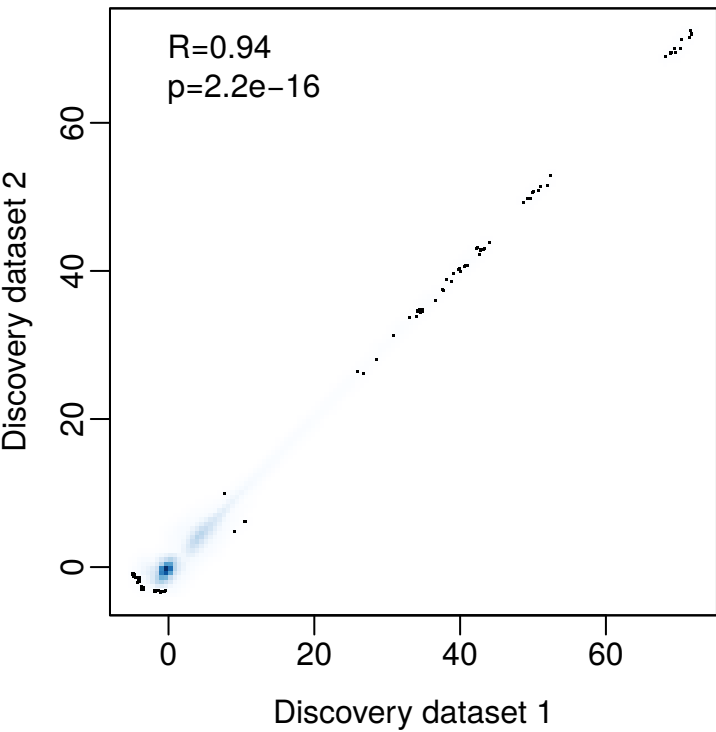

Supplement: can-21-0730_figure_sf1_suppsf1.pdf [file can-21-0730_figure_sf1_suppsf1.pdf]

# Figure S2

## A

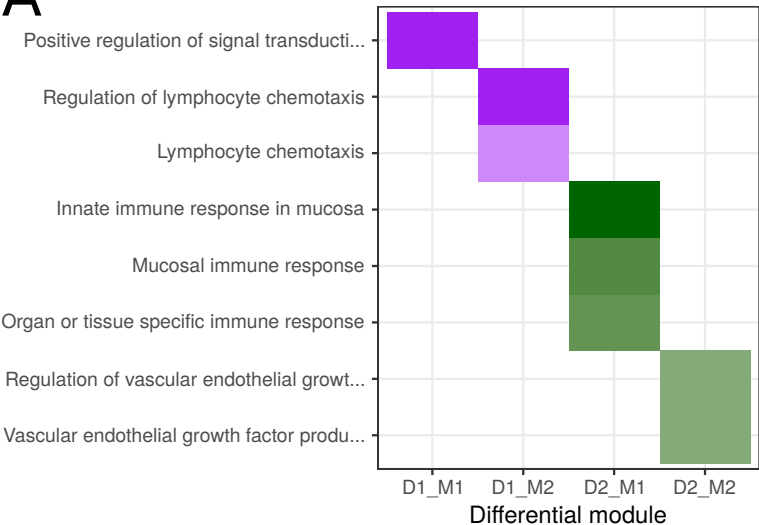

Obs/Exp

*Dataset 1*

≥40

20

0

20

≥40

*Dataset 2*

## B

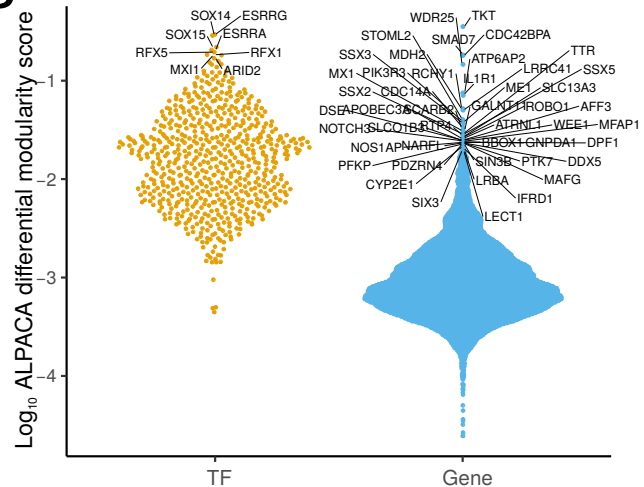

Supplement: can-21-0730_figure_sf2_suppsf2.pdf [file can-21-0730_figure_sf2_suppsf2.pdf]

Figure S3

A

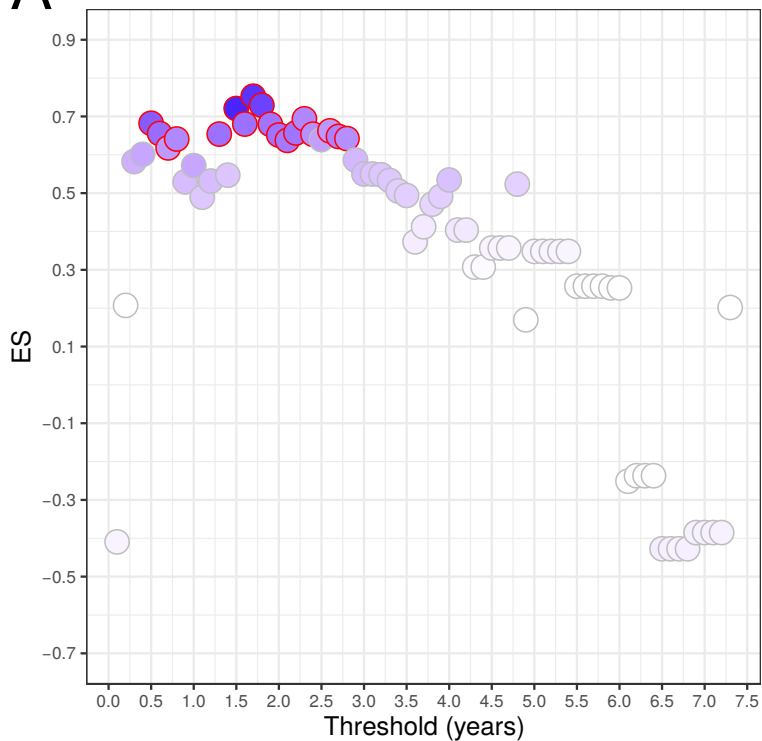

B

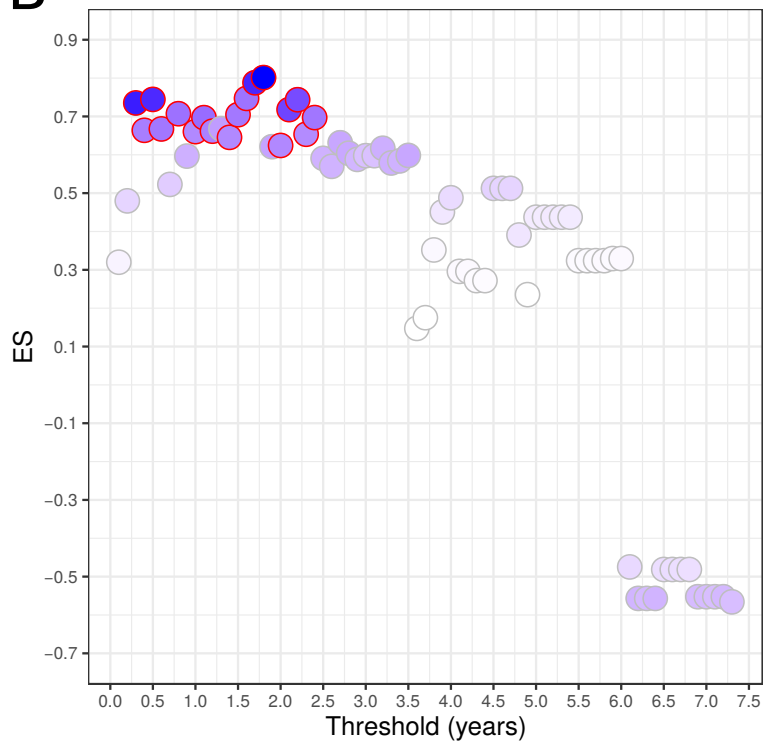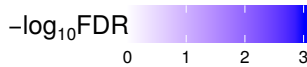

Supplement: can-21-0730_figure_sf3_suppsf3.pdf [file can-21-0730_figure_sf3_suppsf3.pdf]

# Figure S4

## A

Discovery dataset 1

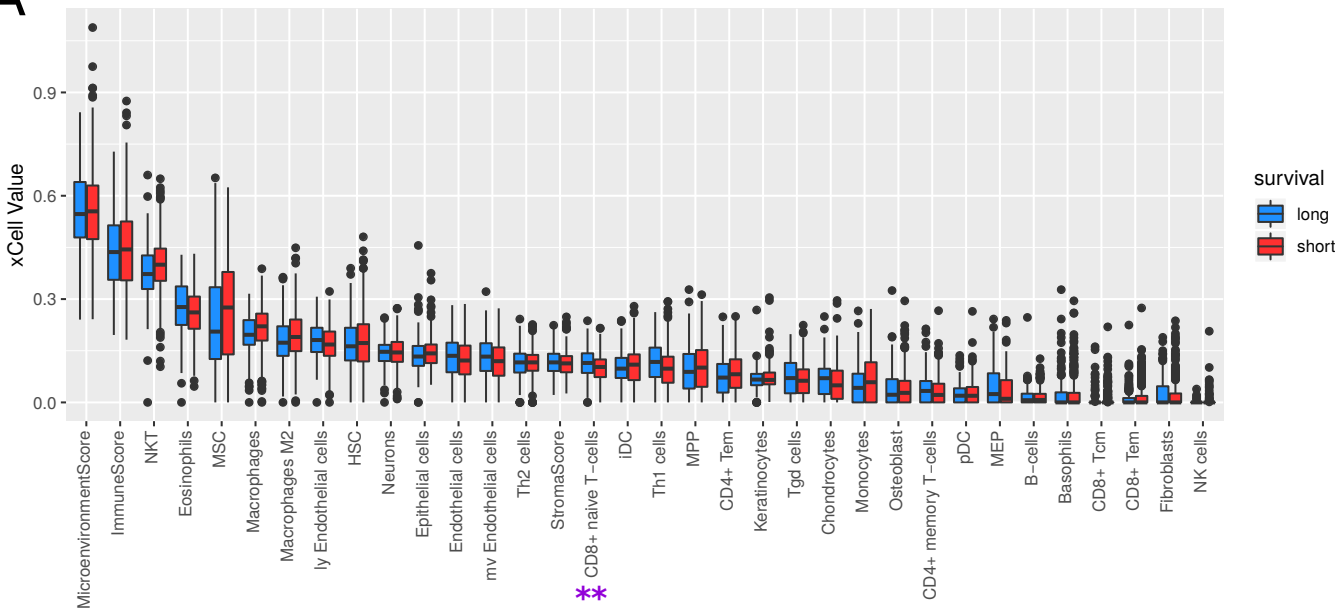

## B

Discovery dataset 2

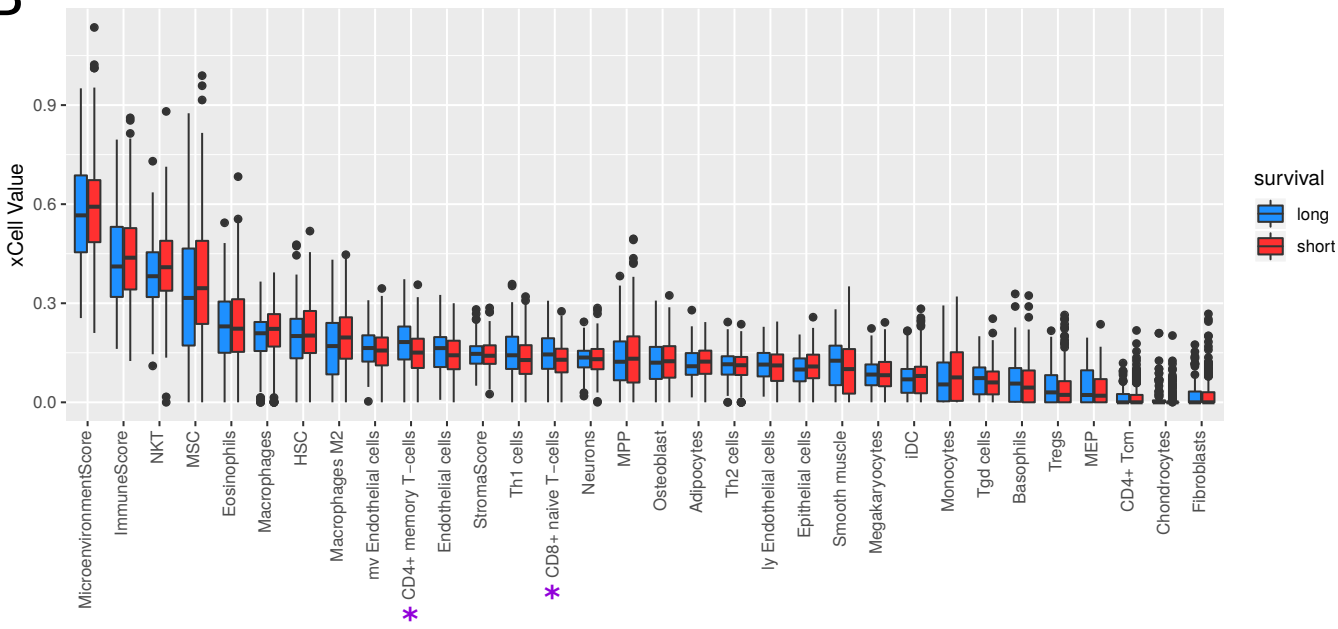

## C

Validation dataset

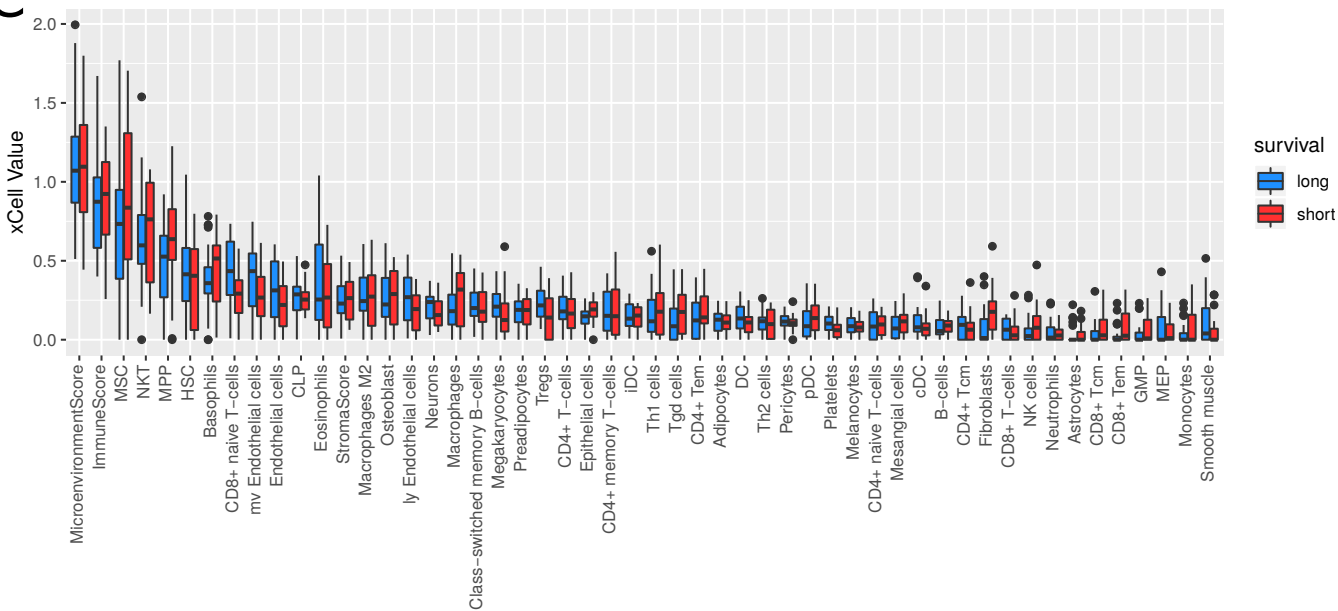

Supplement: can-21-0730_figure_sf4_suppsf4.pdf [file can-21-0730_figure_sf4_suppsf4.pdf]

# Figure S5

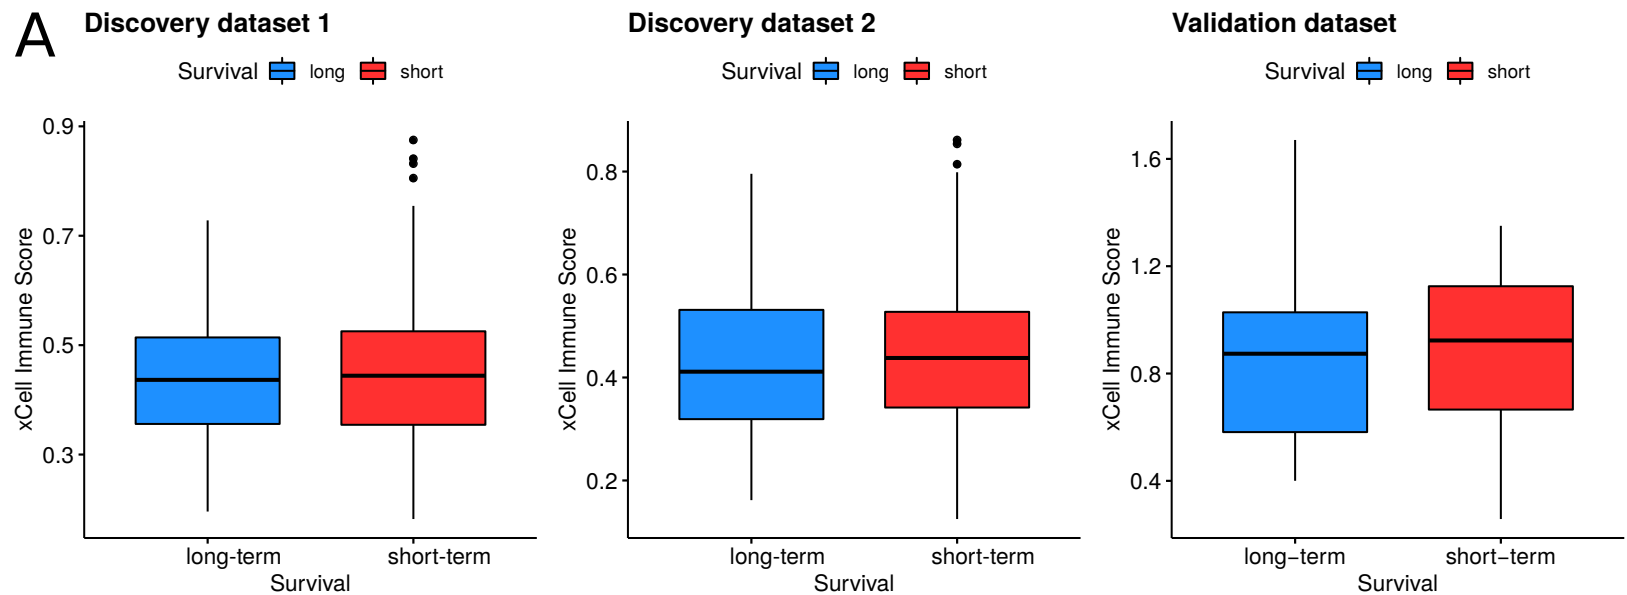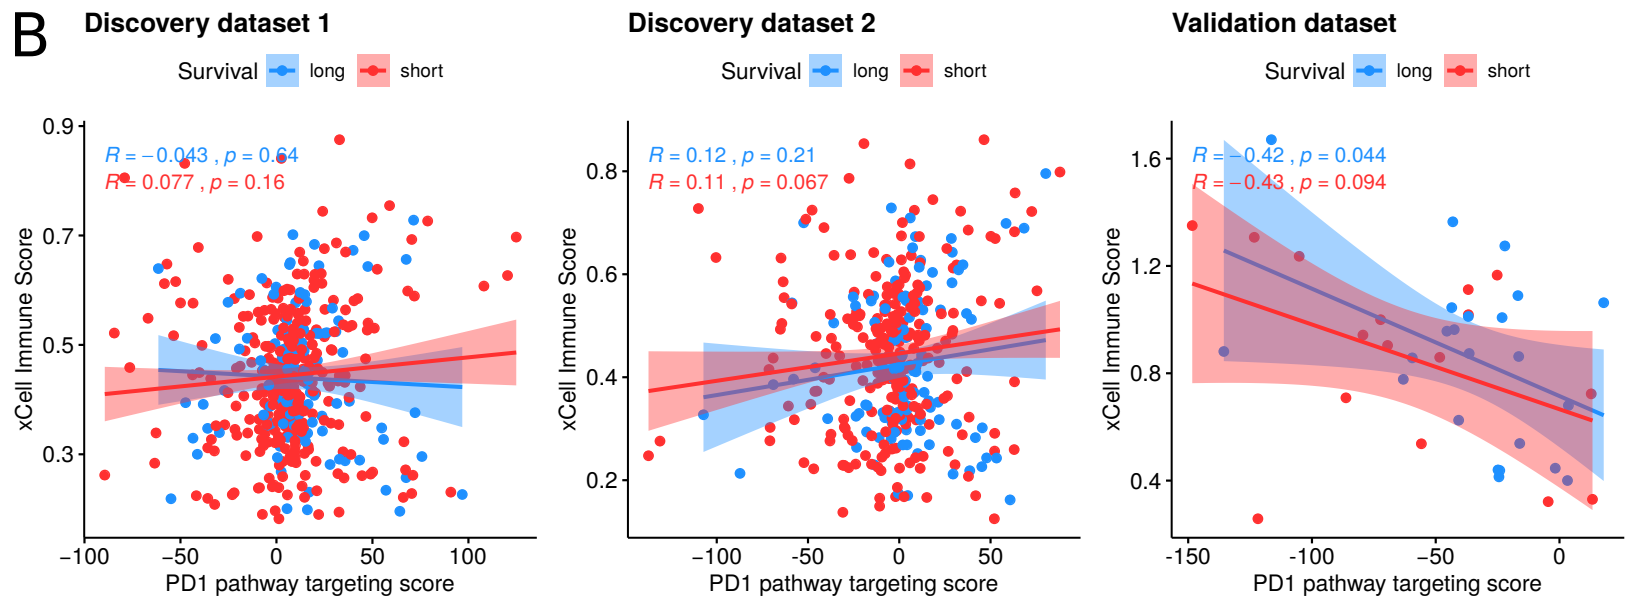

Supplement: can-21-0730_figure_sf5_suppsf5.pdf [file can-21-0730_figure_sf5_suppsf5.pdf]
